# Supplementary material
Source: HighWire-hosted journal article supplement (https://www.cmajopen.ca/content/suppl/2021/07/13/9.3.E718)
Supplement: 2020-0244_Original_submission.pdf [file 2020-0244_Original_submission.pdf]

1  
2  
3  
4 Characteristics, Comorbidities, and Outcomes Among Hospitalized Patients with COVID-19 in  
5 Montreal, Quebec  
6  
7  
8  
9

10 Jordan Mah\*<sup>1</sup>, Anthony Lieu\*<sup>1</sup>, Ling Yuan Kong<sup>1,2,3</sup>, Pouria Alipour<sup>1</sup>, Andràs Tikàsz<sup>1</sup>, Sunny  
11 Song<sup>2</sup>, Arash Akaberi<sup>2</sup>, Adam Palayew<sup>4</sup>, Berson Augustin<sup>2,4</sup>, Suekhleane Bajaj<sup>1</sup>, Veronica  
12 Youssef<sup>1</sup>, Stephen Su Yang<sup>2,5,6</sup>, Jed Lipes<sup>1,2,6</sup>, Mark Palayew<sup>1,7</sup>, Laurent Azoulay<sup>2,4,8</sup>, Christina  
13 Greenaway<sup>1,2,3,4</sup>  
14  
15

16 \*Jordan Mah and Anthony Lieu contributed equally to this manuscript  
17  
18

19 <sup>1</sup>Faculty of Medicine, McGill University, Montréal, Québec, Canada .

20 <sup>2</sup>Lady Davis Institute for Medical Research, Jewish General Hospital, Montréal, Québec, Canada.

21 <sup>3</sup>Division of Infectious Diseases, Jewish General Hospital, Montréal, Québec, Canada.

22 <sup>4</sup>Department of Epidemiology and Biostatistics and Occupational Health, McGill University,  
23 Montréal, Québec, Canada  
24

25 <sup>5</sup>Department of Anesthesia, Jewish General Hospital, Montréal, Québec, Canada

26 <sup>6</sup>Division of Critical Care, Jewish General Hospital, Montréal, Québec, Canada

27 <sup>7</sup>Division of Respiriology, Jewish General Hospital, Montréal, Montréal, Québec, Canada

28 <sup>8</sup>Gerald Bronfman Department of Oncology, McGill University, Quebec, Canada.  
29  
30  
31  
32  
33  
34

35 Corresponding author

36 Dr Christina Greenaway

37 Division of Infectious Diseases

38 SMBD-Jewish General Hospital

39 3755 Côte St. Catherine Road, Room G-200

40 Montreal, Quebec, H3T 1E2

41 Ph: (514) 340-8222 #22933

42 Fax (514) 340-7546

43 Email: [ca.greenaway@mcgill.ca](mailto:ca.greenaway@mcgill.ca)  
44  
45  
46

47 Abstract Word Count: 249

48 Word Count: 2490

49 Tables: 4

50 Figures: 2  
51  
52  
53

54 June 25, 2020  
55  
56  
57

## Abstract

**Background:** The province of Quebec has been the epicenter of the COVID-19 crisis in Canada, accounting for over half of Canada's cases and mortality. Initial COVID-19 cases occurred in returned travelers and their contacts, then shifted in mid-April to the elderly nursing home population. We describe the clinical characteristics and outcomes of hospitalized patients with COVID-19 and how this changed over time in Montreal.

**Methods:** We conducted a retrospective case series of all hospitalizations with laboratory confirmed SARS-CoV-2 infection at the Jewish General Hospital in Montreal from March 4 to April 27, 2020. Demographic, co-morbidities, and clinical outcomes were collected by reviewing electronic medical records and laboratory data.

**Results:** Among 330 hospitalizations, the mean age was  $71.9 \pm 18.6$  years, 56.1% (185/330) were females and 22% (74/330) were admitted to ICU. The overall mortality rate was 15.8% (52/330); 10.8% (8/74) in the ICU and 25.6% (33/129) among nursing home (NH) residents. The proportion of NH resident admissions increased from 20.1% (39/194) between March 4-April 2 to 66.2% (90/136) from April 13-26, 2020. NH residents were older (85.0 vs 63.4 years), more likely to be female (69.8% vs 47.3%), and had more co-morbidities (82.2% vs 46.8% had  $\geq 2$  co-morbidities) versus non-NH residents.

**Interpretation:** A large and increasing proportion of COVID-19 admissions over the study period occurred among NH residents who had a high mortality rate. Policies and practices that prevent outbreaks of COVID-19 in long term care settings should be established to prevent high mortality in this vulnerable population.

## Introduction

The severe acute respiratory syndrome coronavirus 2 (SARS-CoV-2) causing Coronavirus disease 2019 (COVID-19) has swept across the world affecting all countries resulting in more than 9.5 million cases and 480 000 deaths since it was first described in December 2019, in Wuhan China.(1) COVID-19 leads to severe disease in 15-20% of cases who require hospitalization, one third of whom may require intensive care support and mechanical ventilation.(2) The Province of Quebec has been the epicenter of the COVID-19 health crisis in Canada, accounting for more than one half of Canada's cases and mortality. As of June 20, over 54 600 cases and more than 5 400 deaths have been attributed to COVID-19 in Quebec.(1, 3) Montreal has been especially affected, accounting for more than half of all provincial cases and 61% of all provincial deaths.(3)

Early transmission dynamics were driven by returning travelers who imported SARS-CoV-2 from other countries, with the first case in Quebec diagnosed on February 27 2020.(4) In addition, several large gatherings with attendees coming from not-yet recognized epicenters such as New York City, led to many infections and disease. These newly infected cases included the elderly who lived in seniors' residences and long term care facilities (LTCF) that led to transmission within these institutions. Simultaneously, health care workers (HCWs) who frequently worked in multiple facilities, led to further spread within and between these institutions.(5) Finally, the HCWs unknowingly imported SARS-CoV-2 into the community. Many of these HCWs were of lower socioeconomic status and lived in crowded environments, thus facilitating spread within their households and potentially spreading disease through transportation to and from work.(6, 7)

1  
2  
3 The Jewish General Hospital (JGH) in Montreal was one of two adult hospitals initially  
4  
5 designated to receive patients with COVID-19 infection in Quebec, and had the largest number  
6  
7 of COVID-19 admissions. The aim of this study is to describe the clinical characteristics and  
8  
9 outcomes of hospitalized patients at the JGH and how the population and their outcomes  
10  
11 changed over the study period.  
12  
13  
14  
15  
16  
17

## 18 **Methods**

19  
20 We conducted a case series of all COVID-19 positive persons who were hospitalized at the JGH  
21  
22 from March 4, 2020 to April 27, 2020, with outcomes measured up until April 27, 2020. The JGH  
23  
24 is a McGill affiliated 637 bed acute care and tertiary care hospital in Montreal, Quebec and was  
25  
26 one of the initial designated adult referral center for COVID-19 positive patients in Quebec.  
27  
28 Confirmation of SARS-CoV-2 was by a positive polymerase chain reaction (PCR), developed and  
29  
30 validated by the Quebec provincial lab targeting the envelope gene (E-gene), with specimens  
31  
32 obtained from the nasopharynx or lower respiratory tract. Data were obtained from patient  
33  
34 charts, the electronic medical record, and the laboratory system. Demographic data, past  
35  
36 medical history including medical co-morbidities and medications, onset of and description of  
37  
38 presenting symptoms, initial physical examination, initial laboratory data and clinical outcomes  
39  
40 and disposition (death, discharged, still admitted) were collected throughout the hospital  
41  
42 admission. Data was extracted by co-authors (PA, AT, SB, VY, JM, AL) and data queries were  
43  
44 verified by two infectious disease staff (CG, LK). The level of medical intervention (LOI) and  
45  
46 goals of care are established for each patient admitted to the hospital, we assigned the last LOI  
47  
48 for each patient.(8) This is classified into 4 categories; Level 1 includes provision of all  
49  
50  
51  
52  
53  
54  
55  
56  
57  
58  
59  
60

1  
2  
3 interventions offered by the medical team including admission to the Intensive Care Unit (ICU),  
4  
5 intubation and cardiopulmonary resuscitation (CPR). Level 2 has some specific restrictions  
6  
7 including no CPR and/or no intubation. Level 3 aims at treating reversible conditions with  
8  
9 directions for no transfer to ICU and no CPR; Level 4 focuses on palliation. Nursing home (NH)  
10  
11 residents were defined as those living in residences for seniors or long-term care facilities  
12  
13 (LTCF) that provide care for adults with decreased independence and who usually require more  
14  
15 than 3 hours of care per day. Acute kidney injury was defined as a 25% decrease from baseline  
16  
17 GFR, lymphopenia as an absolute lymphocyte count  $<1.0 \times 10^9/L$ , hypoxemia was defined as O<sub>2</sub>  
18  
19 sat  $<88\%$  on room air and/or the need for supplemental oxygen.  
20  
21  
22  
23  
24

## 25 **Analysis**

26  
27 Descriptive statistics were used to summarize baseline demographic characteristics, clinical  
28  
29 characteristics, laboratory values on admission, complications during hospitalization, and  
30  
31 disposition at the end of the study period (death, discharged or still admitted). Continuous  
32  
33 variables were presented as a mean and a standard deviation (SD) or a median and an  
34  
35 interquartile range (IQR), as appropriate. Categorical variables were presented as a total  
36  
37 number and a proportion. Kaplan Meier survival analysis was used to estimate crude  
38  
39 cumulative incidence of death at 30 days of follow-up. Estimates were stratified by nursing  
40  
41 home and non-nursing home residents. No imputations was made for missing data. All  
42  
43 analyses were done in SAS, version 9.4 (SAS Institute, Cary, NC).  
44  
45  
46  
47  
48  
49  
50  
51

## 52 **Results**

53  
54 Between March 4, 2020 and April 27, 2020, there were 330 patients with a laboratory-  
55  
56  
57

1  
2  
3 confirmed diagnosis of SARS-CoV-2 admitted to the JGH. The mean age  $\pm$  standard deviation of  
4  
5 patients was  $71.9 \pm 18.6$  years (range; 21 to 101 years); 185 (56.1%) were female and the  
6  
7 median time of onset of symptoms prior to hospitalizations was 6.0 days [Interquartile range  
8  
9 (IQR) 3.0-10.0]. Baseline demographic and clinical characteristics are shown in Table 1. Two  
10  
11 hundred (60.6%) patients had  $\geq 2$  co-morbidities, the most common co-morbidities being  
12  
13 hypertension (194 patients, 58.8%), dementia (101 patients, 30.6%), and diabetes (84 patients,  
14  
15 25.5%). A total of 129 (39.1%) admissions were among NH Residents. The LOI was level 3 or 4  
16  
17 in 123 (37.3%) patients. Fever, cough or upper respiratory tract symptoms were present in 246  
18  
19 (74.5%) patients and 65 (19.7%) had diarrhea as a presenting symptom. The majority of  
20  
21 patients presented with tachypnea [224 (71.6%)], defined as a respiratory rate  $>20$  breaths per  
22  
23 minute. Just under half of admissions [144 (43.6%)] were hypoxic and required supplemental  
24  
25 oxygen. Lymphopenia on admission was present in 161 (49.2%) cases. A total of 230 patients  
26  
27 (69.7%) received both hydroxychloroquine and azithromycin after admission, as this was the  
28  
29 routine practice at the JGH between March 22 and April 24, 2020, unless there was prolong QTc  
30  
31 or another contraindication. A total of 88 patients (26.7%) received steroids, eight patients  
32  
33 (2.4%) Lopinavir/Ritonavir and six patients (1.8%) received Tocilizumab.  
34  
35  
36  
37  
38  
39  
40  
41  
42

### 43 Nursing Home Residents

44  
45  
46 Over the course of the study period the characteristics of the patient population changed  
47  
48 (Figure 1). The proportion of NH residents increased from 20.1% (39/194) of admissions from  
49  
50 March 4-April 12 to 66.2% of admissions (90/136) from April 13-26, 2020. The mean age  
51  
52 increased between these two periods from 68.1 to 77.3 years. The demographics and clinical  
53  
54 outcomes for NH or non-NH residents is presented in Table 2. NH residents were older  
55  
56  
57  
58  
59  
60

1  
2  
3 compared to non-NH residents ( $85.0 \pm 11.0$  years vs.  $63.5 \pm 17.6$  years) and were more likely to  
4  
5 be female (69.8% vs. 47.3%), had a higher number of co-morbidities [82.2% vs 46.8% had  $\geq 2$   
6  
7 co-morbidities] and were more likely to have dementia (69.0% vs 6.0%). The majority of NH  
8  
9 residents were LOI 3 or 4, thus not eligible for admission to ICU. Five (3.9%) patients from NH  
10  
11 were admitted to the ICU for a median of 3.0 days (IQR 3.0-7.0); none were intubated. At the  
12  
13 end of the study period 25.6% of NH residents had died, 26.4% had been discharged from  
14  
15 hospital, and 48.1% were still admitted. The median length of hospital stay for NH residents  
16  
17 was 9.0 days (IQR 6.0-13.0) and the median time to death after admission was 7.0 days (IQR  
18  
19 5.0-11.0). Nursing home residents died earlier in hospital than those not from a NH (Figure 2).

#### 25 26 Intensive Care Unit (ICU) admissions

27  
28  
29 A total of 74 (22.4%) patients were admitted to the ICU, 47 (63.5%) directly from the  
30  
31 emergency room and 27 (36.5%) from the ward. The clinical characteristics and outcomes of  
32  
33 ICU vs non-ICU patients are presented in table 3. Persons admitted to the ICU were younger  
34  
35 ( $63.4 \pm 13.3$  vs  $74.3 \pm 19.2$  years) and were more likely to be male (58.1% vs. 39.8%) compared to  
36  
37 those not admitted to the ICU. The median number of days of symptoms before ICU admission  
38  
39 was 8.0 (IQR 4.0-11.0). A total of 50 (68.5%) ICU patients were intubated and the median length  
40  
41 of intubation was 11.0 days (IQR 6.5-14.5). Patients admitted to the ICU had several  
42  
43 complications including Acute Respiratory Distress Syndrome (38 patients, 64.4%), bacterial  
44  
45 pneumonia (14 patients, 24.1%), thromboembolic disease (pulmonary embolism/deep vein  
46  
47 thrombosis; 7 patients, 12.1%) and acute kidney injury (20 patients, 34.5%). The median length  
48  
49 of ICU stay was 11.0 days (IQR 5.0-17.0) and the median length of hospital stay for ICU-  
50  
51 admitted patients was 18.0 days (IQR 10.0-25.0). Steroids were given to 52.7% (39/74) of ICU  
52  
53  
54  
55  
56  
57  
58  
59  
60

1  
2  
3 admissions and to 58.0% (29/50) of those intubated. Five intubated patients received  
4  
5 Tocilizumab. At the end of the study period, 10.8% (8/74) of people admitted to the ICU had  
6  
7 died, 55.4% (41/74) were discharged, and 33.8% (25/74) were still in hospital. The median time  
8  
9 to death for people admitted to ICU was 17 days (IQR 11.5-19.0).  
10  
11  
12

#### 13 14 Hospital Disposition: Discharge, death, and still admitted

15  
16 The characteristics and clinical outcomes of patients with COVID-19 by disposition (discharge,  
17  
18 death, still admitted) is shown in Table 4. The majority of deaths (43 patients, 82.7%) occurred  
19  
20 in those over age 70, having been admitted from a NH (33 patients, 63.5%), having ≥2 medical  
21  
22 co-morbidities (47 patients, 90.4%), and with LOI 3 or 4 (44 patients, 84.6%). Of those still  
23  
24 admitted more than half were from an NH (62 patients, 58.5%) and almost one quarter were in  
25  
26 the ICU (25 patients, 23.6%).  
27  
28  
29  
30  
31  
32  
33  
34  
35  
36  
37  
38  
39  
40  
41  
42  
43  
44  
45  
46  
47  
48  
49  
50  
51  
52  
53  
54  
55  
56  
57  
58  
59  
60



## Interpretation

We present a comprehensive overview of a cohort of COVID-19 hospitalized patients from Montreal, Quebec, the Canadian epicenter, demonstrating an important shift in epidemiology over the study period to elderly, nursing home patients with dementia and multiple co-morbidities. This reflected the changing epidemiology of COVID positive cases in the community over the study period. The overall mortality rate in hospitalized patients was similar to previously reported in the USA and China (15.7%), but mortality was high in nursing home patients (25.6%) and increased with age and underlying co-morbidities. Despite the proportion of hospitalized patients admitted to the ICU being comparable to other centers (22.4%), our ICU mortality was lower (10.8%) than that reported in the USA and Italy, yet similar to another Canadian setting.(9-11)

In early March, at the beginning of the pandemic, the majority of COVID-19 cases occurred in returned travelers and their contacts. By mid-April several outbreaks in seniors residences and LTCF had occurred. The characteristics of the hospitalized patients in our study reflected this shift in community epidemiology. LTCF have been the center of the COVID-19 epidemic in Canada and in many cities across North America.(12, 13) Transmission within LTCF was facilitated and amplified by health care workers (HCW). Many HCWs in Canadian LTCF work part-time at low wages without benefits, and therefore work in several facilities to earn a living wage.(5) These facilities often have shared bedrooms or bathrooms, communal dining areas, and often lacked adequate person protective equipment, factors that promoted the transmission of the virus between residents and HCW. Transmission was likely further amplified

1  
2  
3 by pre-symptomatic or asymptomatic infected residents, or those with atypical COVID-19  
4  
5 clinical presentations.(14) The later, including fatigue, delirium, falls, and general deterioration,  
6  
7 symptoms more common in the elderly, lead to a delay in diagnosis. (12, 14)  
8  
9

10  
11  
12  
13 Nursing home residents are particularly vulnerable to severe COVID-19 infection as they are  
14  
15 elderly and usually have multiple medical co-morbidities. Consequently, they have represented  
16  
17 more than 80% of COVID-19 deaths in Canada. (3, 5) The average age of residents of LTCF in  
18  
19 Canada is 82 years old.(5, 13) They are predominantly female (65%), frail with multiple  
20  
21 comorbidities, and have a high prevalence of dementia.(13, 15, 16) The case fatality rate from  
22  
23 COVID-19 among residents in Canadian LTCF is estimated to be 36% (range 20 to 42%).(3, 5)  
24  
25 The NH population in our study had similar age, sex and frequency of dementia as reported in  
26  
27 Canadian LTCF residents and had a similar case fatality rate (26%) compared to national  
28  
29 estimates.(5) Nursing home residents in our study died earlier than non-NH residents (60%  
30  
31 within 7 days and 94% within 14 days), and likely reflects the LOI of 3 or 4.  
32  
33  
34  
35  
36  
37  
38  
39

40 The higher proportion of females in our study population (56.1%) reflects the high proportion  
41  
42 of females (69.8%) in nursing homes.(16) In our study, men were more likely to be admitted to  
43  
44 the ICU (58.1%) and accounted for the majority of ICU deaths (6/8; 75.0%), as well as the  
45  
46 majority of the deaths among non-NH residents (14/19; 73.7%). This is consistent with other  
47  
48 studies.(17-19) The higher risk of severe COVID-19 among males is well described.(20) These  
49  
50 differences may be due to sex-specific mechanisms modulating the course of disease, which  
51  
52 include increased expression of the viral entry receptor angiotensin converting enzyme 2 and  
53  
54  
55  
56  
57

1  
2  
3 the impact of sex hormones on receptor expression, and/or innate and adaptive immune  
4  
5 responses and immunosenescence.(20)  
6  
7  
8  
9

10 The characteristics of patients in our study admitted to the ICU are similar to those in other  
11  
12 studies from Canada, the US and Europe. (9-11) Overall, 22.4% of patients were admitted to the  
13  
14 ICU. The proportion requiring intubation (68.5%), the median length of intubation, and ICU stay  
15  
16 of 11.0 days is similar to that reported in other settings in North America. (9-11) Mortality in  
17  
18 COVID-19 patients admitted to the ICU has ranged from 15% - 30% in Canada, the USA, China  
19  
20 and Italy, and up to 60% - 80% in New York City.(2, 9-11, 21, 22) The lower ICU mortality rate  
21  
22 may be due to the fact that 52.7% of the population in our study received steroids. A recent  
23  
24 randomized controlled trial found that mortality among ICU patients decreased by 30% if they  
25  
26 were given dexamethasone.(23) The lower mortality in our study may also be underestimated,  
27  
28 as one third of patients were still admitted at the end of the study period.  
29  
30  
31  
32  
33  
34  
35  
36  
37  
38  
39  
40  
41  
42  
43  
44  
45  
46  
47  
48  
49  
50  
51  
52  
53  
54  
55  
56  
57  
58  
59  
60

Our study has several limitations. This was a retrospective study and some characteristics such  
as obesity and racial/ethnic origin associated with severe COVID-19 outcomes were not  
reported in the medical chart and are not accounted for.(17, 24) The duration of follow up was  
short and all outcomes were not available for the 32.1% of the population that was still  
admitted. This is a single center study in Montreal, Canada and may not be applicable to all  
other jurisdictions, however it is the largest case series of hospitalized COVID-19 patients in the  
epicenter of the Canadian COVID-19 pandemic.

## Conclusions

We report a large case series of hospitalized COVID-19 cases in Montreal, Canada that captures the shift of the hospitalized patients from younger returned travelers at the beginning of the epidemic to the elderly nursing home population. COVID-19 has highlighted the need to reassess processes and policies in LTCF in Canada. Given the frailty and vulnerability of residents in LTCF, proper implementation of infection prevention and control policies will be critical to reducing infection and disease in this population, and will have benefits for possible subsequent waves of COVID-19 and for other infectious disease outbreaks.

Confidential

1  
2  
3  
4  
5  
6 Funding: No funding  
7

8 Author contribution:

9 Conceptualization: CG, LK,

10 Data curation: JM, AL, LK, PA, AT, SB, VY

11 Formal analysis: SS, AA, AP, BA

12 Funding acquisition : Not applicable

13 Investigation: JM, AL, LK

14 Methodology: CG, LA, AA, AP, BA

15 Project administration: CG

16 Resources: CG

17 Software: CG

18 Supervision: CG, LK

19 Validation: CG, SS, AA

20 Visualization: AT, AP, BA

21 Writing-original draft: CG, JM, AL, MP

22 Writing-review & editing: JM, AL, KL, PA, AT, SS, AA, AP, BA, SB, VY, SY, JL, MP, LA, CG  
23  
24  
25  
26  
27  
28

29 Acknowledgements:

30 Dr. Azoulay holds a Chercheur-Boursier Senior Award from the Fonds de Recherche du Québec -  
31 Santé and is the recipient of a William Dawson Scholar award from McGill University.  
32  
33  
34

35 Titles for Figures

36 Figure 1: Hospital admissions between March 4 to April 27, 2020 stratified by nursing home  
37 residents and non-nursing home residents and mean age  
38  
39

40 Figure 2: Time to Death in Nursing home vs Non-Nursing Home Residents  
41  
42  
43  
44  
45  
46  
47  
48  
49  
50  
51  
52  
53  
54  
55  
56  
57  
58  
59  
60

## References

1. Johns Hopkins University. COVID-19 Dashboard by the Center for Systems Science and Engineering (CSSE) at Johns Hopkins University (JHU) [Internet]. JHU; 2020 [cited 2020 April 20]. Available from: <https://gisanddata.maps.arcgis.com/apps/opsdashboard/index.html#/bda7594740fd40299423467b48e9ecf6>.
2. Wu Z, McGoogan JM. Characteristics of and Important Lessons From the Coronavirus Disease 2019 (COVID-19) Outbreak in China: Summary of a Report of 72 314 Cases From the Chinese Center for Disease Control and Prevention. JAMA. 2020.
3. Institut national de santé publique Québec. Données COVID-19 au Québec [Internet]. Quebec, Quebec 2020 [updated June 13, 2020; cited 2020 June 14]. Available from: <https://www.inspq.qc.ca/covid-19/donnees>.
4. Institut national de santé publique Québec. Ligne du temps COVID-19 au Québec [Internet]. Quebec, Quebec 2020 [updated June 13, 2020; cited 2020 June 14]. Available from: <https://www.inspq.qc.ca/covid-19/donnees/ligne-du-temps>.
5. Hsu A, Lane N, Sinha S, Dunning J, Dhuper M, Kahiel Z, et al. Understanding the impact of COVID-19 on residents of Canada's long-term care homes – ongoing challenges and policy responses International Long Term Care Policy Network; 2020 June 4, 2020.
6. Montreal Public Health. État de Situation Île de Montréal, ses arrondissements et les villes liées. 16 juin 2020 [Internet]. Montreal 2020 [cited 2020 June 23]. Available from: <https://santemontreal.qc.ca/fileadmin/fichiers/Campagnes/coronavirus/situation-montreal/COVID19-Situation-Montreal-Arrondissements-VillesLiees.pdf>.
7. Tracey Lindeman. Why are so many people getting sick and dying in Montreal from Covid-19? The Guardian, International Edition. 2020 May 13.
8. Ells C. Levels of Intervention: Communicating with More Precision About Planned Use of Critical Interventions. American J of Bioethics. 2010;10(1):78-9.
9. Petrilli CM, Jones SA, Yang J, Rajagopalan H, O'Donnell L, Chernyak Y, et al. Factors associated with hospital admission and critical illness among 5279 people with coronavirus disease 2019 in New York City: prospective cohort study. BMJ. 2020;369:m1966.
10. Grasselli G, Zangrillo A, Zanella A, Antonelli M, Cabrini L, Castelli A, et al. Baseline Characteristics and Outcomes of 1591 Patients Infected With SARS-CoV-2 Admitted to ICUs of the Lombardy Region, Italy. JAMA. 2020.

- 1  
2  
3 11. Mitra AR, Fergusson NA, Lloyd-Smith E, Wormsbecker A, Foster D, Karpov A, et al.  
4 Baseline characteristics and outcomes of patients with COVID-19 admitted to intensive  
5 care units in Vancouver, Canada: a case series. *Cmaj*. 2020.  
6  
7
- 8 12. McMichael TM, Currie DW, Clark S, Pogosjans S, Kay M, Schwartz NG, et al.  
9 Epidemiology of Covid-19 in a Long-Term Care Facility in King County, Washington. *N*  
10 *Engl J Med*. 2020.  
11
- 12 13. Hsu A, Lane N. Impact of COVID-19 on residents of Canada's long-term care homes —  
13 ongoing challenges and policy response. *International Long Term Care Policy Network*;  
14 2020.  
15
- 16 14. Kimball A HKAMEa. Asymptomatic and Presymptomatic SARS-CoV-2 Infections in  
17 Residents of a Long-Term Care Skilled Nursing Facility — King County, Washington,  
18 March 2020. *MMWR Morb Mortal Wkly Rep*. 2020;69:377–81.  
19
- 20 15. Canadian Health Institute for Health Information (CIHI). Dementia in long-term care.  
21 Dementia in Canada. 2018 June 26, 2018.  
22
- 23 16. Alberta Health CCB. 2015/2016 Alberta Long-Term Care Resident Profile. Alberta  
24 Government; 2017.  
25
- 26 17. Richardson S, Hirsch JS, Narasimhan M, Crawford JM, McGinn T, Davidson KW, et al.  
27 Presenting Characteristics, Comorbidities, and Outcomes Among 5700 Patients  
28 Hospitalized With COVID-19 in the New York City Area. *JAMA*. 2020.  
29
- 30 18. Lewnard JA, Liu VX, Jackson ML, Schmidt MA, Jewell BL, Flores JP, et al. Incidence,  
31 clinical outcomes, and transmission dynamics of hospitalized 2019 coronavirus disease  
32 among 9,596,321 individuals residing in California and Washington, United States: a  
33 prospective cohort study. *medRxiv*. 2020:2020.04.12.20062943.  
34
- 35 19. Reilev M, Kristensen KB, Pottegaard A, Lund LC, Hallas J, Ernst MT, et al. Characteristics  
36 and predictors of hospitalization and death in the first 9,519 cases with a positive RT-  
37 PCR test for SARS-CoV-2 in Denmark: A nationwide cohort. *medRxiv*.  
38 2020:2020.05.24.20111823.  
39
- 40 20. Gebhard C, Regitz-Zagrosek V, Neuhauser HK, Morgan R, Klein SL. Impact of sex and  
41 gender on COVID-19 outcomes in Europe. *Biol Sex Differ*. 2020;11(1):29.  
42
- 43 21. Yang X, Yu Y, Xu J, Shu H, Xia J, Liu H, et al. Clinical course and outcomes of critically ill  
44 patients with SARS-CoV-2 pneumonia in Wuhan, China: a single-centered, retrospective,  
45 observational study. *Lancet Respir Med*. 2020.  
46
- 47 22. Auld SC, Caridi-Scheible M, Blum JM, Robichaux C, Kraft C, Jacob JT, et al. ICU and  
48 Ventilator Mortality Among Critically Ill Adults With Coronavirus Disease 2019. *Crit Care*  
49 *Med*. 2020.  
50  
51  
52  
53  
54  
55  
56  
57

- 1
  - 2
  - 3
  - 4
  - 5
  - 6
  - 7
  - 8
  - 9
  - 10
  - 11
  - 12
  - 13
  - 14
  - 15
  - 16
  - 17
  - 18
  - 19
  - 20
  - 21
  - 22
  - 23
  - 24
  - 25
  - 26
  - 27
  - 28
  - 29
  - 30
  - 31
  - 32
  - 33
  - 34
  - 35
  - 36
  - 37
  - 38
  - 39
  - 40
  - 41
  - 42
  - 43
  - 44
  - 45
  - 46
  - 47
  - 48
  - 49
  - 50
  - 51
  - 52
  - 53
  - 54
  - 55
  - 56
  - 57
  - 58
  - 59
  - 60
23. Horby P. Randomised Evaluation of COVID-19 Therapy (RECOVERY) [Internet]. United Kingdom 2020 [updated June 5, 2020. Available from: <https://clinicaltrials.gov/ct2/show/NCT04381936>.
24. Webb Hooper M, Napoles AM, Perez-Stable EJ. COVID-19 and Racial/Ethnic Disparities. JAMA. 2020.

Confidential



**Table 1. Demographic, initial clinical, and laboratory values in hospitalized COVID positive patients**

|                           | <b>Total<br/>N = 330</b> |
|---------------------------|--------------------------|
| <b>Demographics</b>       | <b>N (%)</b>             |
| Age (Mean $\pm$ SD years) | 71.9 (18.6)              |
| Age Group                 |                          |
| <50                       | 39 (11.8)                |
| 50-59                     | 49 (14.8)                |
| 60-69                     | 42 (12.7)                |
| 70-79                     | 63 (19.1)                |
| $\geq$ 80                 | 137 (41.5)               |
| Female                    | 185 (56.1)               |
| Length of symptoms days*  | 6.0 (3.0-10.0)           |
| Level of Intervention     |                          |
| 1                         | 190 (57.6)               |
| 2                         | 17 (5.2)                 |
| 3                         | 90 (27.3)                |
| 4                         | 33 (10.0)                |
| Nursing Home Resident     | 129 (39.1)               |
| Number of Comorbidities   |                          |
| 0                         | 64 (19.4)                |
| 1                         | 66 (20.0)                |
| $\geq$ 2                  | 200 (60.6)               |
| Hypertension              | 194 (58.8)               |
| Coronary Artery Disease   | 55 (16.7)                |
| Congestive Heart Failure  | 33 (10.0)                |
| Diabetes                  | 84 (25.5)                |
| Asthma                    | 29 (8.8)                 |
| COPD                      | 38 (11.5)                |
| Dementia                  | 101 (30.6)               |
| Symptoms on Admission     |                          |
| Fever/Cough/URTI          | 246 (74.5)               |
| Fever                     | 218 (66.1)               |
| Cough                     | 205 (62.1)               |
| Dyspnea                   | 202 (61.2)               |

|                                    | <b>Total<br/>N = 330</b> |
|------------------------------------|--------------------------|
| URTI                               | 35 (10.6)                |
| Myalgia                            | 48 (14.5)                |
| Fatigue                            | 79 (23.9)                |
| Diarrhea                           | 65 (19.7)                |
| <b>Vitals on Admission</b>         |                          |
| Tachycardia (HR>100) (N=324)       | 73 (22.5)                |
| Tachypnea (RR>20) (N=313)          | 224 (71.6)               |
| Temperature >38.0 (N=314)          | 87 (27.7)                |
| Hypoxia (O2 Sat <88 or Fio2 >0.21) | 144 (43.8)               |
| <b>Lab Values on Admission*</b>    |                          |
| WBC (N=327)                        | 7.0 (5.2-9.4)            |
| Lymphocyte Count (N=327)           | 1.0 (0.7-1.4)            |
| Lymphopenia* (N=327)               | 161 (49.2)               |
| Platelets (N=325)                  | 200 (155.0-265.0)        |
| Creatinine (N=320)                 | 84.0 (66.5-114.0)        |
| ALT (N=260)                        | 24.0 (16.0-38.5)         |
| Procalcitonin (N=233)              | 0.1 (0.1-0.3)            |
| LDH (N=221)                        | 327.0 (263.0-410.0)      |
| D dimer (N=177)                    | 934 (604-1333)           |
| IL 6 (N=74)                        | 38.1 (17.3-78.4)         |

\*Expressed as Median and interquartile range (IQR)

**Table 2 Demographic characteristics and clinical outcomes in Nursing Home compared to Non-nursing home residents**

|                                    | <b>Nursing Home<br/>N = 129 (39.1%)</b> | <b>Non Nursing Home<br/>N = 201 (60.9%)</b> |
|------------------------------------|-----------------------------------------|---------------------------------------------|
| <b>Demographics</b>                |                                         |                                             |
| Age (Mean $\pm$ SD years)          | 85.0 (11.0)                             | 63.4 (17.6)                                 |
| Age Group                          |                                         |                                             |
| <50                                | 1 (0.8)                                 | 38 (18.9)                                   |
| 50-59                              | 3 (2.3)                                 | 46 (22.9)                                   |
| 60-69                              | 7 (5.4)                                 | 35 (17.4)                                   |
| 70-79                              | 21 (16.3)                               | 42 (20.9)                                   |
| $\geq$ 80                          | 97 (75.2)                               | 40 (19.9)                                   |
| Female                             | 90 (69.8)                               | 95 (47.3)                                   |
| Length of symptom (days) (N=314)*  | 4.0 (2.0-8.0)                           | 7.0 (4.0-10.0)                              |
| Level of Intervention              |                                         |                                             |
| 1                                  | 24 (18.6)                               | 166 (82.6)                                  |
| 2                                  | 11 (8.5)                                | 6 (3.0)                                     |
| 3                                  | 69 (53.5)                               | 21 (10.4)                                   |
| 4                                  | 25 (19.4)                               | 8 (4.0)                                     |
| Number of Comorbidities            |                                         |                                             |
| 0                                  | 4 (3.1)                                 | 60 (29.9)                                   |
| 1                                  | 19 (14.7)                               | 47 (23.4)                                   |
| $\geq$ 2                           | 106 (82.2)                              | 94 (46.8)                                   |
| Dementia                           | 89 (69.0)                               | 12 (6.0)                                    |
| Fever/Cough/URTI                   | 83 (64.3)                               | 163 (81.1)                                  |
| Hypoxia                            | 62 (48.4)                               | 82 (40.8)                                   |
| <b>Hospital Course and Outcome</b> |                                         |                                             |
| ICU Admission                      | 5 (3.9)                                 | 69 (34.3)                                   |
| Intubated                          |                                         | 50 (67.6)                                   |
| Length of Intubation (days)*       |                                         | 11.0 (6.5-14.5)                             |
| Length of ICU stay (days)*         | 3.0 (3.0-7.0)                           | 12.0 (6.0-17.0)                             |
| Length of Hospital stay (days)*    | 9.0 (6.0-13.0)                          | 8.0 (5.0-16.0)                              |
| Disposition at Discharge           |                                         |                                             |
| Death                              | 33 (25.6)                               | 19 (9.5)                                    |

|                                       | <b>Nursing Home<br/>N = 129 (39.1%)</b> | <b>Non Nursing Home<br/>N = 201 (60.9%)</b> |
|---------------------------------------|-----------------------------------------|---------------------------------------------|
| Discharged                            | 34 (26.4)                               | 138 (68.7)                                  |
| Still Admitted                        | 62 (48.1)                               | 44 (21.9)                                   |
| Time to Death (days) (N=52)*          | 7.0 (5.0-11.0)                          | 8.0 (5.0-18.0)                              |
| <b>Complications In Hospital</b>      |                                         |                                             |
| Bacterial Pneumonia (N=261)           | 13 (15.1)                               | 22 (12.6)                                   |
| ARDS (N=263)                          | 9 (10.3)                                | 41 (23.3)                                   |
| Thomboembolic disease(PE/DVT) (N=261) | 4 (4.7)                                 | 9 (5.1)                                     |
| Acute kidney Injury (N=260)           | 20 (23.5)                               | 33 (18.9)                                   |
| Dialysis (N=260)                      |                                         | 5 (2.9)                                     |
| Liver enzyme abnormalities (N=259)    | 3 (3.6)                                 | 37 (21.1)                                   |

\*Expressed as Median and interquartile range (IQR)

**Table 3 Demographic characteristics and clinical outcomes in ICU admitted compared to non-ICU admitted**

|                                       | Non-ICU<br>N = 256 (77.6) | ICU<br>N = 74 (22.4) |
|---------------------------------------|---------------------------|----------------------|
| <b>Demographics</b>                   |                           |                      |
| Age (Mean ± SD years)                 | 74.3 (19.2)               | 63.4 (13.3)          |
| Age Group                             |                           |                      |
| <50                                   | 30 (11.7)                 | 9 (12.2)             |
| 50-59                                 | 34 (13.3)                 | 15 (20.3)            |
| 60-69                                 | 21 (8.2)                  | 21 (28.4)            |
| 70-79                                 | 38 (14.8)                 | 25 (33.8)            |
| ≥80                                   | 133 (52.0)                | 4 (5.4)              |
| Sex (Female)                          | 154 (60.2)                | 31 (41.9)            |
| Length of Symptom (days)* (N=314)     | 5.0 (3.0-9.0)             | 8.0 (4.0-11.0)       |
| Nursing Home resident                 | 124 (48.4)                | 5 (6.8)              |
| Level Of Intervention                 |                           |                      |
| 1                                     | 125 (48.8)                | 65 (87.8)            |
| 2                                     | 13 (5.1)                  | 4 (5.4)              |
| 3                                     | 87 (34.0)                 | 3 (4.1)              |
| 4                                     | 31 (12.1)                 | 2 (2.7)              |
| Comorbidity                           |                           |                      |
| 0                                     | 44 (17.2)                 | 20 (27.0)            |
| 1                                     | 52 (20.3)                 | 14 (18.9)            |
| ≥2                                    | 160 (62.5)                | 40 (54.1)            |
| Fever / Cough / URTI                  | 174 (68.0)                | 72 (97.3)            |
| Hypoxia (N=329)                       | 100 (39.2)                | 44 (59.5)            |
| <b>Hospital Course and Outcome</b>    |                           |                      |
| Intubated (N=87)                      |                           | 50 (68.5)            |
| Length of Intubation(days)* (N=36)    |                           | 11.0 (6.5-14.5)      |
| Length of ICU stay (days)*            |                           | 11.0 (5.0-17.0)      |
| Total Length of Hospital stay (days)* | 7.0 (5.0-12.0)            | 18.0 (10.0-25.0)     |
| Disposition at Discharge              |                           |                      |
| Death                                 | 44 (17.2)                 | 8 (10.8)             |
| Discharged                            | 131 (51.2)                | 41 (55.4)            |

|                                       | <b>Non-ICU</b><br><b>N = 256 (77.6)</b> | <b>ICU</b><br><b>N = 74 (22.4)</b> |
|---------------------------------------|-----------------------------------------|------------------------------------|
| Still Admitted                        | 81 (31.6)                               | 25 (33.8)                          |
| Time To Death (days)* (N=52)          | 7.0 (4.5-11.0)                          | 17.0 (11.5-19.0)                   |
| <b>Complications In Hospital</b>      |                                         |                                    |
| Bacterial Pneumonia (N=261)           | 21 (10.3)                               | 14 (24.1)                          |
| ARDS (N=263)                          | 12 (5.9)                                | 38 (64.4)                          |
| Thomboembolic disease(Pe/Dvt) (N=261) | 6 (3.0)                                 | 7 (12.1)                           |
| Acute kidney Injury (N=260)           | 33 (16.3)                               | 20 (34.5)                          |
| Dialysis (N=260)                      |                                         | 5 (8.6)                            |
| Liver enzyme abnormalities (N=259)    | 16 (8.0)                                | 24 (41.4)                          |

\*expressed as a median and interquartile range

**Table 4 Demographic characteristics and clinical outcomes of patients with COVID-19 by Disposition**

|                                    | <b>Total<br/>N = 330</b> | <b>Death<br/>N = 52 (15.8)</b> | <b>Discharged<br/>N = 172 (52.1)</b> | <b>Still Admitted<br/>N = 106 (32.1)</b> |
|------------------------------------|--------------------------|--------------------------------|--------------------------------------|------------------------------------------|
| <b>Demographics</b>                |                          |                                |                                      |                                          |
| Age Group (in years)               |                          |                                |                                      |                                          |
| <50                                | 39 (11.8)                | 1 (1.9)                        | 36 (20.9)                            | 2 (1.9)                                  |
| 50-59                              | 49 (14.8)                | 3 (5.8)                        | 36 (20.9)                            | 10 (9.4)                                 |
| 60-69                              | 42 (12.7)                | 5 (9.6)                        | 26 (15.1)                            | 11 (10.4)                                |
| 70-79                              | 63 (19.1)                | 8 (15.4)                       | 35 (20.3)                            | 20 (18.9)                                |
| >=80                               | 137 (41.5)               | 35 (67.3)                      | 39 (22.7)                            | 63 (59.4)                                |
| Sex (Female)                       | 185 (56.1)               | 25 (48.1)                      | 94 (54.7)                            | 66 (62.3)                                |
| Level of intervention              |                          |                                |                                      |                                          |
| 1                                  | 190 (57.6)               | 4 (7.7)                        | 142 (82.6)                           | 44 (41.5)                                |
| 2                                  | 17 (5.2)                 | 4 (7.7)                        | 5 (2.9)                              | 8 (7.5)                                  |
| 3                                  | 90 (27.3)                | 18 (34.6)                      | 23 (13.4)                            | 49 (46.2)                                |
| 4                                  | 33 (10.0)                | 26 (50.0)                      | 2 (1.2)                              | 5 (4.7)                                  |
| Nursing home resident              | 129 (39.0)               | 33 (63.5)                      | 34 (19.7)                            | 62 (58.5)                                |
| Comorbidities                      |                          |                                |                                      |                                          |
| 0                                  | 64 (19.4)                |                                | 50 (29.1)                            | 14 (13.2)                                |
| 1                                  | 66 (20.0)                | 5 (9.6)                        | 45 (26.2)                            | 16 (15.1)                                |
| >=2                                | 200 (60.6)               | 47 (90.4)                      | 77 (44.8)                            | 76 (71.7)                                |
| Fever /Cough / URTI                | 246 (74.5)               | 40 (76.9)                      | 138 (80.2)                           | 68 (64.2)                                |
| Hypoxia (N=329)                    | 144 (43.8)               | 34 (65.4)                      | 68 (39.8)                            | 42 (39.6)                                |
| Length of symptoms (days)* (N=314) | 6.0 (3.0-10.0)           | 4.0 (2.0-7.0)                  | 8.0 (4.0-11.0)                       | 5.0 (3.0-9.0)                            |
| <b>Hospital Course and Outcome</b> |                          |                                |                                      |                                          |
| ICU Admission                      | 74 (22.4)                | 8 (15.4)                       | 41 (23.7)                            | 25 (23.6)                                |
| Intubated                          | 50 (57.5)                | 7 (50.0)                       | 24 (51.1)                            | 19 (73.1)                                |
| Length of Intubation* (days)       | 11.0 (6.5-14.5)          | 9.0 (6.0-18.0)                 | 11.0 (6.0-14.0)                      | 12.0 (8.0-18.0)                          |
| Length of ICU stay* (days)         | 11.0 (5.0-17.0)          | 12.5 (7.5-17.0)                | 9.0 (4.0-14.0)                       | 16.0 (9.0-26.0)                          |
| Length hospital stay* (days)       | 9.0 (5.0-14.0)           | 7.0 (5.0-12.0)                 | 8.0 (5.0-13.0)                       | 11.0 (6.0-19.0)                          |
| <b>Complications In Hospital</b>   |                          |                                |                                      |                                          |
| Bacterial Pneumonia (N=261)        | 35 (13.4)                | 9 (18.0)                       | 21 (12.3)                            | 5 (12.5)                                 |
| ARDS (N=263)                       | 50 (19.0)                | 18 (36.0)                      | 24 (14.0)                            | 8 (19.0)                                 |

1  
2  
3  
4  
5  
6  
7  
8  
9  
10  
11  
12  
13  
14  
15  
16  
17  
18  
19  
20  
21  
22  
23  
24  
25  
26  
27  
28  
29  
30  
31  
32  
33  
34  
35  
36  
37  
38  
39  
40  
41  
42  
43  
44  
45  
46  
47  
48  
49  
50  
51  
52  
53  
54  
55  
56  
57  
58  
59  
60

---

|                                    | <b>Total<br/>N = 330</b> | <b>Death<br/>N = 52 (15.8)</b> | <b>Discharged<br/>N = 172 (52.1)</b> | <b>Still Admitted<br/>N = 106 (32.1)</b> |
|------------------------------------|--------------------------|--------------------------------|--------------------------------------|------------------------------------------|
| Thomboembolic disease(PE/DVT)      | 13 (5.0)                 | 2 (4.0)                        | 8 (4.7)                              | 3 (7.5)                                  |
| Acute kidney Injury (N=260)        | 53 (20.4)                | 18 (36.0)                      | 24 (14.0)                            | 11 (28.2)                                |
| Liver enzyme abnormalities (N=259) | 40 (15.4)                | 5 (10.0)                       | 29 (17.0)                            | 6 (15.8)                                 |

\*Expressed as Median and interquartile range

Confidential



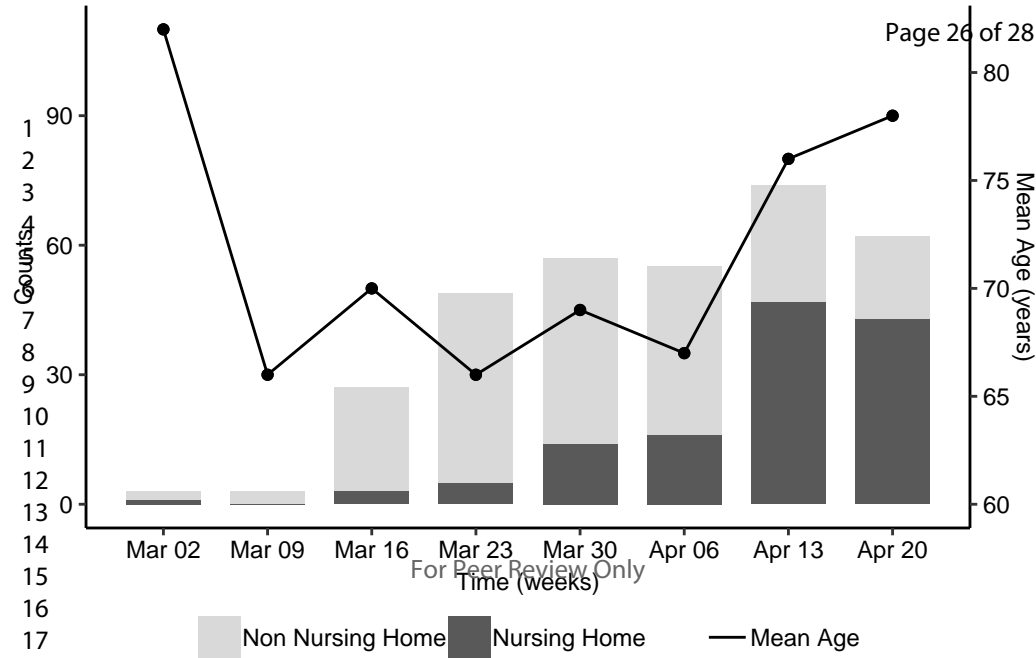

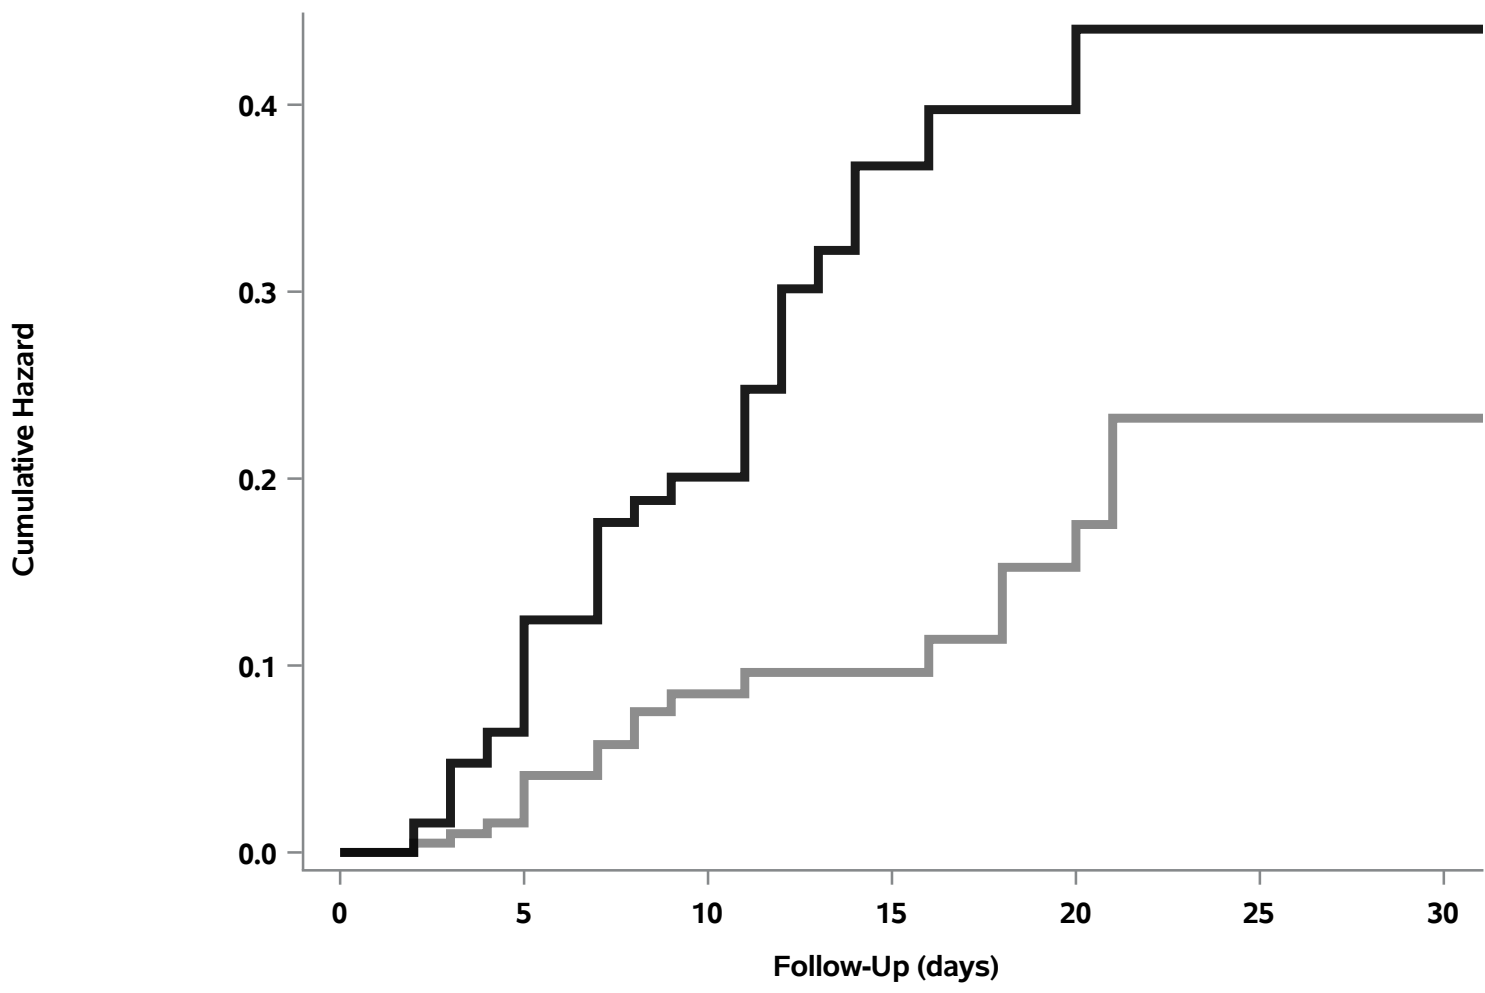

|                         | 0          | 5          | 10        | 15        | 20        | 25        | 30        |
|-------------------------|------------|------------|-----------|-----------|-----------|-----------|-----------|
| <b>Non Nursing Home</b> | <b>201</b> | <b>155</b> | <b>85</b> | <b>54</b> | <b>37</b> | <b>22</b> | <b>14</b> |
| <b>Nursing Home</b>     | <b>129</b> | <b>109</b> | <b>57</b> | <b>25</b> | <b>14</b> | <b>8</b>  | <b>4</b>  |

STROBE Statement—Checklist of items that should be included in reports of *cross-sectional studies*

|                              | Item No | Recommendation                                                                                                                                                                                    | Page No              |
|------------------------------|---------|---------------------------------------------------------------------------------------------------------------------------------------------------------------------------------------------------|----------------------|
| <b>Title and abstract</b>    | 1       | (a) Indicate the study's design with a commonly used term in the title or the abstract                                                                                                            | 2                    |
|                              |         | (b) Provide in the abstract an informative and balanced summary of what was done and what was found                                                                                               | 2                    |
| <b>Introduction</b>          |         |                                                                                                                                                                                                   |                      |
| Background/rationale         | 2       | Explain the scientific background and rationale for the investigation being reported                                                                                                              | 3-4                  |
| Objectives                   | 3       | State specific objectives, including any prespecified hypotheses                                                                                                                                  | 4                    |
| <b>Methods</b>               |         |                                                                                                                                                                                                   |                      |
| Study design                 | 4       | Present key elements of study design early in the paper                                                                                                                                           | 4                    |
| Setting                      | 5       | Describe the setting, locations, and relevant dates, including periods of recruitment, exposure, follow-up, and data collection                                                                   | 4                    |
| Participants                 | 6       | (a) Give the eligibility criteria, and the sources and methods of selection of participants                                                                                                       | 4                    |
| Variables                    | 7       | Clearly define all outcomes, exposures, predictors, potential confounders, and effect modifiers. Give diagnostic criteria, if applicable                                                          | 4-5                  |
| Data sources/<br>measurement | 8*      | For each variable of interest, give sources of data and details of methods of assessment (measurement). Describe comparability of assessment methods if there is more than one group              | 4-5                  |
| Bias                         | 9       | Describe any efforts to address potential sources of bias                                                                                                                                         | 11                   |
| Study size                   | 10      | Explain how the study size was arrived at                                                                                                                                                         | 4                    |
| Quantitative variables       | 11      | Explain how quantitative variables were handled in the analyses. If applicable, describe which groupings were chosen and why                                                                      | 5                    |
| Statistical methods          | 12      | (a) Describe all statistical methods, including those used to control for confounding                                                                                                             | 5                    |
|                              |         | (b) Describe any methods used to examine subgroups and interactions                                                                                                                               | 5                    |
|                              |         | (c) Explain how missing data were addressed                                                                                                                                                       | 5                    |
|                              |         | (d) If applicable, describe analytical methods taking account of sampling strategy                                                                                                                |                      |
|                              |         | (e) Describe any sensitivity analyses                                                                                                                                                             |                      |
| <b>Results</b>               |         |                                                                                                                                                                                                   |                      |
| Participants                 | 13*     | (a) Report numbers of individuals at each stage of study—eg numbers potentially eligible, examined for eligibility, confirmed eligible, included in the study, completing follow-up, and analysed | 5                    |
|                              |         | (b) Give reasons for non-participation at each stage                                                                                                                                              |                      |
|                              |         | (c) Consider use of a flow diagram                                                                                                                                                                |                      |
| Descriptive data             | 14*     | (a) Give characteristics of study participants (eg demographic, clinical, social) and information on exposures and potential confounders                                                          | 5-8<br>Tables<br>1-4 |
|                              |         | (b) Indicate number of participants with missing data for each variable of interest                                                                                                               | Tables<br>2-4        |
| Outcome data                 | 15*     | Report numbers of outcome events or summary measures                                                                                                                                              | 6-8<br>Tables<br>2-4 |

1  
2  
3  
4  
5  
6  
7  
8  
9  
10  
11  
12  
13  
14  
15  
16  
17  
18  
19  
20  
21  
22  
23  
24  
25  
26  
27  
28  
29  
30  
31  
32  
33  
34  
35  
36  
37  
38  
39  
40  
41  
42  
43  
44  
45  
46  
47  
48  
49  
50  
51  
52  
53  
54  
55  
56  
57  
58  
59  
60

|                          |    |                                                                                                                                                                                                              |                      |
|--------------------------|----|--------------------------------------------------------------------------------------------------------------------------------------------------------------------------------------------------------------|----------------------|
| Main results             | 16 | (a) Give unadjusted estimates and, if applicable, confounder-adjusted estimates and their precision (eg, 95% confidence interval). Make clear which confounders were adjusted for and why they were included | N/A                  |
|                          |    | (b) Report category boundaries when continuous variables were categorized                                                                                                                                    | 5-8<br>Tables<br>1-4 |
|                          |    | (c) If relevant, consider translating estimates of relative risk into absolute risk for a meaningful time period                                                                                             |                      |
| Other analyses           | 17 | Report other analyses done—eg analyses of subgroups and interactions, and sensitivity analyses                                                                                                               | Figure<br>2          |
| <b>Discussion</b>        |    |                                                                                                                                                                                                              |                      |
| Key results              | 18 | Summarise key results with reference to study objectives                                                                                                                                                     | 9-11                 |
| Limitations              | 19 | Discuss limitations of the study, taking into account sources of potential bias or imprecision. Discuss both direction and magnitude of any potential bias                                                   | 11                   |
| Interpretation           | 20 | Give a cautious overall interpretation of results considering objectives, limitations, multiplicity of analyses, results from similar studies, and other relevant evidence                                   | 9-12                 |
| Generalisability         | 21 | Discuss the generalisability (external validity) of the study results                                                                                                                                        | 11                   |
| <b>Other information</b> |    |                                                                                                                                                                                                              |                      |
| Funding                  | 22 | Give the source of funding and the role of the funders for the present study and, if applicable, for the original study on which the present article is based                                                | 13                   |

\*Give information separately for exposed and unexposed groups.

**Note:** An Explanation and Elaboration article discusses each checklist item and gives methodological background and published examples of transparent reporting. The STROBE checklist is best used in conjunction with this article (freely available on the Web sites of PLoS Medicine at <http://www.plosmedicine.org/>, Annals of Internal Medicine at <http://www.annals.org/>, and Epidemiology at <http://www.epidem.com/>). Information on the STROBE Initiative is available at [www.strobe-statement.org](http://www.strobe-statement.org).
